# Supplementary material for: Interleukin-12 (IL-12)/STAT4 Axis Is an Important Element for β-Cell Dysfunction Induced by Inflammatory Cytokines
Source: PubMed Central journal article supplement (PMC4640700; doi:10.1371/journal.pone.0142735), 2015-11-10
Supplement: pone.0142735.s001.pdf [file pone.0142735.s001.pdf]

5.204  
11.114  
4.862  
18.652  
28.901  
5.295  
12.871  
9.894  
11.584  
21.044  
21.044  
14.244  
8.861  
6.768  
10.702  
2.204  
23.045  
12.128  
3.289  
3.875  
10.296  
6.877  
0.82  
5.089  
9.022  
3.362  
23.828  
18.831  
0  
33.314  
0  
18.295  
9.828  
5.51  
4.907  
5.285  
7.74  
5.448  
3.305  
0  
8.807  
4.4  
37.123  
19.474  
36.091  
8.6  
18.728  
13.445  
23.865  
36.259  
46.14  
28.947  
13.169  
8.885  
9.993  
1.406  
9.741  
3.031  
2.2  
26.048  
18.741  
48.122  
48.893  
90.011  
38.287  
48.17  
0  
0  
12.712  
11.214  
90.825  
88.862  
82.235  
24.665  
71.012  
28.091  
68.948  
37.322  
48.423  
8.291  
28.829  
19.778  
11.897  
22.286  
13.045  
41.303  
23.436  
48.335  
33.415  
29.163  
48.885  
6.101  
1.287  
0.246  
0  
3.95  
6.941  
0  
17.41  
12.21  
6.966  
12.811  
27.813  
26.942  
91.868  
48.324  
48.885  
38.697  
2.728  
0.897  
7.883  
6.761  
1.882  
6.837  
11.723  
6.81  
4.838  
22.062  
27.042  
68.137  
36.467  
74.811  
14.472  
37.205  
43.097  
21.77  
38.812  
7.068  
7.068  
1.89  
4.413  
1.715  
9.16  
7.381  
14.415  
4.295  
12.097  
10.964  
28.874  
52.221  
20.765  
42.946  
26.894  
97.886  
97.028  
32.38

0.8546314 1.193229 1.402808 1.414601  
1.72582 1.07766 1.20888 1.16688  
1.262747 1.033224 0.980771 1.151595  
1.2624 1.09989 1.4284  
0.800403 1.543 0.817778 1.259268  
1.443132 1.72011 1.680968 1.259446  
1.262689 1.137182 0.867908 1.279787  
1.262687 1.100628 0.789478 1.271446  
1.101189 1.221 1.038277 0.862824  
1.87484 2.2388 0.862118 1.871065  
1.140771 1.427926 1.138740 1.614172  
1.448281 1.310288 1.088888 1.318763  
1.088203 1.414779 0.803884 1.311888  
1.6477 1.847182 0.802826 1.600898  
1.189378 1.800979 1.444978  
1.088188 1.110058 1.654618  
1.203778 1.212682 1.311884  
1.272223 1.240483 1.216822  
0.808283 1.183972 1.380787  
1.201861 1.017241 1.384976  
0.808979 1.192223 0.819828  
1.01847 1.044287 1.426849  
0.782887 1.014689 1.22414  
0.888973 1.124811 1.214385  
0.808283 1.084489 0.882025  
1.128872 1.0812 1.102855  
1.028278 1.284584 1.110288  
0.884723 1.481525 1.191025  
1.031861 1.40981  
0.798812 1.620478  
1.05448 0.798428 1.171284  
1.11217 0.824282 0.972978  
1.048282 0.754285 1.207838  
1.17188 0.781942 0.73282  
1.11287 1.212873 1.110017  
0.867188 1.43127 0.848083  
1.04418 1.108284 0.881926  
1.08444 1.014611 0.877623  
1.28101 2.08382 1.881812  
1.27711 1.877888 1.16848  
1.10788 0.881874 1.84014  
1.28109 1.082284 1.28109  
0.818181 0.8181287 1.023 1.023  
0.873783 1.118911 0.868438  
1.030886 0.788978  
0.8679183 0.868973  
0 1.03888  
0.9182101  
0.7282846  
0.7882828  
0.7278983  
0.7181214  
0.742814  
0.878888  
1.248888  
1.018481  
0.818289  
0.747887  
0.8482436  
1.048481  
0.8288978

53 985  
49 254  
32 495  
50 972  
51 056  
33 094  
48 365  
43 052  
12 209  
4 981  
18 329  
13 977  
8 128  
13 5  
8 791  
0  
0  
17 041  
37 864  
37 864  
32 248  
33 701  
48 968  
48 946  
52 577  
20 38  
43 882  
44 921  
43 771  
32 976  
3 997  
18 277  
5 895  
3 025  
7 968  
13 768  
8 208  
44 845  
48 872  
87 083  
59 639  
77 17  
7 18  
72 738  
28 395  
48 087  
33 952  
84 244  
23 995  
23 322  
20 307  
26 185  
28 483  
26 205  
25 82  
24 62  
8 215  
1 521  
4 535  
2 64  
3 419  
18 271  
18 394  
6 88  
6 78  
11 387  
17 731  
18 184
